# Supplementary material for: The larvicide pyriproxyfen blamed during the Zika virus outbreak does not cause microcephaly in zebrafish embryos
Source: PubMed Central journal article supplement (PMC5209666; doi:10.1038/srep40067), 2017-01-04
Supplement: srep40067-s1.pdf [file srep40067-s1.pdf]

## Supplementary information

*Manuscript SREP-16-36307: The larvicide pyriproxyfen blamed during the Zika virus outbreak does not cause microcephaly in zebrafish embryos.*

*By Stefania Dzieciolowska, Anne-Laure Larroque, Elizabeth-Ann Kranjec, Pierre Drapeau and Eric Samarut*

## Supplementary Figures

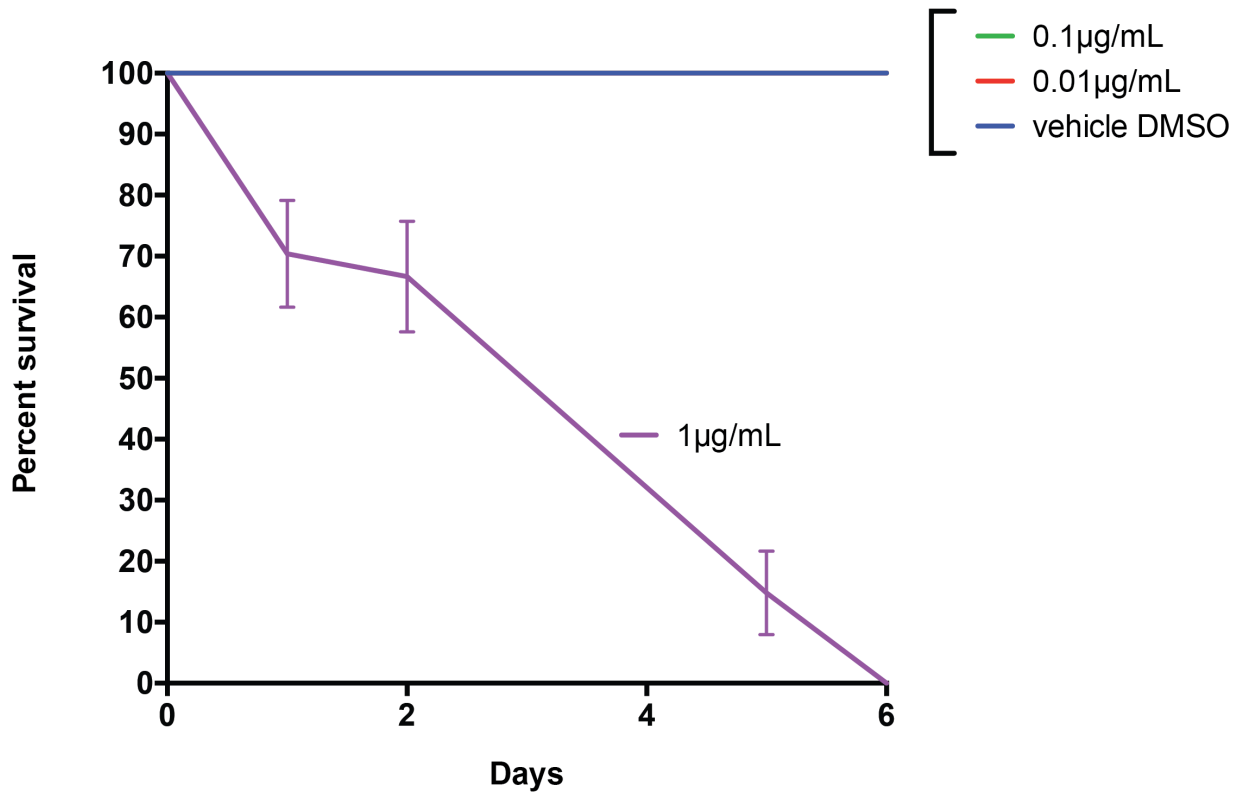

Dzieciolowska et al., Supp. Figure 1

**A**

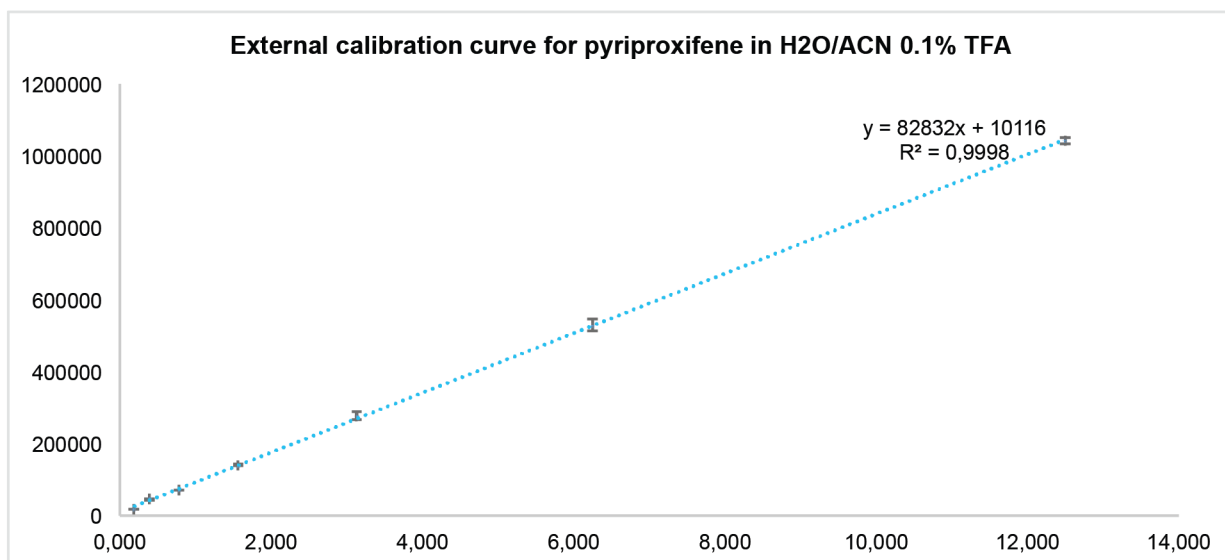

**B**

| Pyriproxyfen amounts contained in zebrafish embryos following different water concentration exposition |                            |                                                |                      |                                |                                    |                       |
|--------------------------------------------------------------------------------------------------------|----------------------------|------------------------------------------------|----------------------|--------------------------------|------------------------------------|-----------------------|
| Pyriproxyfen water concentration (µg/mL)                                                               | Number of embryos in water | Dilution factor applied before sample analysis | Area response (a.u.) | Amounts per embryo (ng/embryo) | Mean amount per embryo (ng/embryo) | Std. dev. (ng/embryo) |
| 1                                                                                                      | 4                          | 1/10000                                        | 128722               | 115,04243                      | 108                                | 7                     |
|                                                                                                        |                            |                                                | 114620               | 101,36010                      |                                    |                       |
|                                                                                                        |                            |                                                | 121543               | 108,07673                      |                                    |                       |
| 0,1                                                                                                    | 6                          | 1/1000                                         | 264943               | 16,47771                       | 17,3                               | 0,7                   |
|                                                                                                        |                            |                                                | 284308               | 17,72998                       |                                    |                       |
|                                                                                                        |                            |                                                | 285431               | 17,80283                       |                                    |                       |
| 0,01                                                                                                   | 6                          | 1/100                                          | 344778               | 2,16389                        | 2,14                               | 0,03                  |
|                                                                                                        |                            |                                                | 335132               | 2,10165                        |                                    |                       |
|                                                                                                        |                            |                                                | 343940               | 2,15854                        |                                    |                       |

Dzieciolowska et al., Supplementary Figure 2

**A**

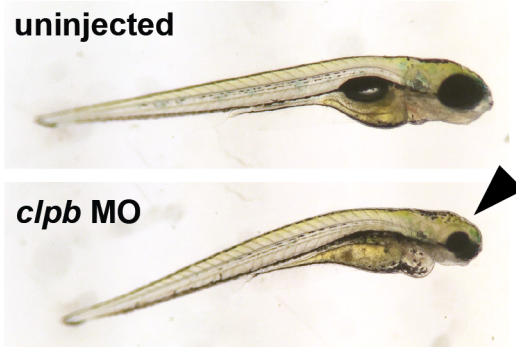

**B**

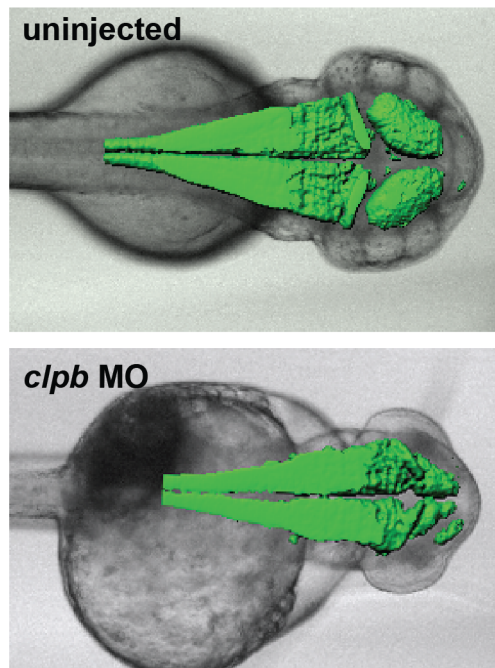

**C**

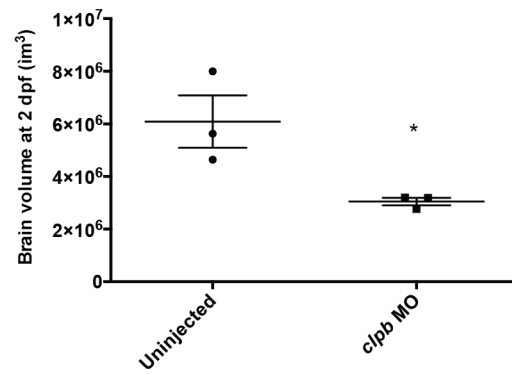

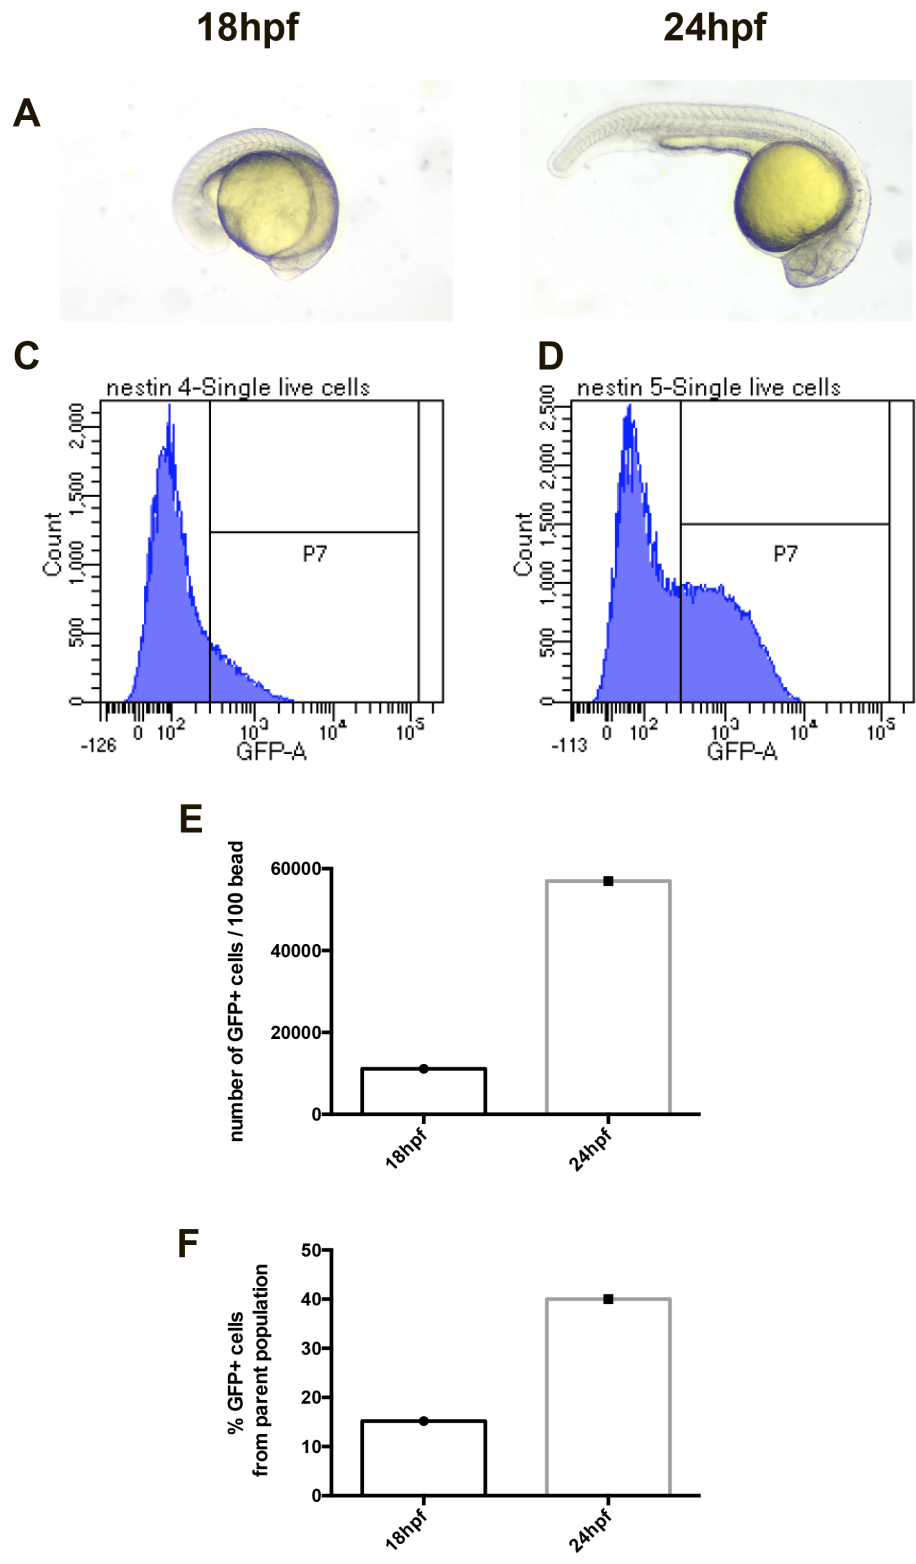

Dzieciolowska et al., Supplemental Figure 4

## Legends to Supplementary figures

**Supplementary Figure 1: Pyriproxyfen has the same effect when diluted into DMSO.** Percentage of survival of embryos treated from 2-4 cell stage with pyriproxyfen concentrations of 0.01 µg/ml 0.1 µg/ml and 1 µg/ml. As observed in Figure 1, the latter dose appears to be lethal with 100% of death after 6 days of development. Lower doses of pyriproxyfen (0.01; 0.1 µg/ml) do not induce a severe decrease in the survival rate.

**Supplementary Figure 2: LC-MS: Pyriproxyfen quantification** (A) External calibration curve of pyriproxyfen. The equation of the curve is  $y = 82832x + 10116$ , where  $y$  represents area of response and  $x$  is the concentration in nM. The linear correlation coefficient ( $R^2$ ) is 0.9998. (B) Quantification of pyriproxyfen per zebrafish embryo following the exposure to different concentrations in water.

**Supplementary Figure 3: *clpb*-morpholino induced microcephaly leads to a reduced brain volume in zebrafish embryo.** (A) 48 hpf embryos injected with a *clpb* morpholino exhibit a microcephaly phenotype (e.g reduced head size, black arrow head) as described by Capo-Chichi et al.<sup>39</sup> (B) *elavl3:GFP* embryos were injected with *clpb* morpholino and imaged at 48 hpf under a confocal microscope. (C) The 3D-brain volume calculation shows a reduced brain volume compared to uninjected embryos.

**Supplementary Figure 4: nestin+ population quantification from 18 hpf versus 24 hpf embryos.** (A) Bright field image of 18 and 24 hpf embryo. (B, C) The GFP+ cell population (e.g.[*nestin:GFP*]) was distinguishable using a 488 nm laser with a 530/30 BP

filter (population labeled P7). The fluorescent beads were distinguishable using a 561 nm laser with a 610/20 BP filter and a 405 nm laser with a 525/50 BP filter. (E) The number of nestin+ cells counted per 100 beads increases by a factor of 3 in 24 hpf embryos compared to 18 hpf embryos (F) The same results presented as a percentage of GFP+ cells/parent population also show an increase in the number of GFP+ cells at 24 hpf. (N=1, n=25 embryos)
